# Supplementary material for: Experimental Assessment ofMoringa oleiferaLeaf and Fruit for Its Antistress, Antioxidant, and Scavenging Potential UsingIn VitroandIn VivoAssays
Source: Hindawi journal article supplement (doi:10.1155/2012/519084), 2011-12-14

## Supplementary Data:

**Table 1. Constituents present in different parts of moringa tree.**

| <b>Parts</b>       | <b>Phytochemical constituents</b>                                                                                                                                                                           |
|--------------------|-------------------------------------------------------------------------------------------------------------------------------------------------------------------------------------------------------------|
| Stem               | octacosanic acid, 4-hydroxymellein, vanillin, $\beta$ -sitosterone and $\beta$ -sitosterol                                                                                                                  |
| Bark               | 4-( $\alpha$ -L-rhamnopyranosyloxy)-benzylglucosinolate                                                                                                                                                     |
| Whole gum exudates | L-arabinose, D-galactose, L-rhamnose, D-mannose, D-xylose, D-glucuronic acid and leucoanthocyanin                                                                                                           |
| Leaves             | Glycoside niazirin, niazirinin and three mustard oil glycosides, 4-[4'-O-acetyl- $\alpha$ -L-rhamnosyloxy) benzyl] isothiocyanate, niaziminin A and B                                                       |
| Mature flowers     | D-mannose, D-glucose, protein, ascorbic acid, polysaccharide                                                                                                                                                |
| Whole pods         | Nitriles, isothiocyanate, thiocarbanates, 0-[2'-hydroxy-3'-(2''-heptenyloxy)]-propylundecanoate, 0-ethyl-4-[( $\alpha$ -1-rhamnosyloxy)-benzyl] carbamate, methyl-p-hydroxybenzoate and $\beta$ -sitosterol |
| Mature seeds       | Crude protein, Crude fat, carbohydrate, methionine, cysteine, 4-( $\alpha$ -L-rhamnopyranosyloxy)-benzylglucosinolate, benzylglucosinolate, moringyne, mono-palmitic and di-oleic triglyceride              |
| Seed oil           | Vitamin A, beta carotene, precursor of Vitamin A                                                                                                                                                            |
| Roots              | 4-( $\alpha$ -L-rhamnopyranosyloxy)-benzylglucosinolate and benzylglucosinolate                                                                                                                             |

**Table 2. Different compounds present in leaves and pods of moringa**

| Leaves                                                                      | Pods                                 |                                               |                                                  |
|-----------------------------------------------------------------------------|--------------------------------------|-----------------------------------------------|--------------------------------------------------|
| Niaziminin A                                                                | Pentacosane                          | 4-(p-Hydroxy) Phenyl ethylbutanoate           | 9-Octadecenoic acid                              |
| Niaziminin B                                                                | Heptacosane                          | Isothiocyanato hexanoic acid                  | 4, 10-Dimethyl-13-nonacosanol                    |
| 4-(2',3',4'-Tri-Oacetyl-a-L-rhamnosyloxy) benzyl nitrile                    | Nonacosane                           | Octadecanoic acid                             | Docosanoic acid                                  |
| Niazicinin A                                                                | Sulfur                               | Eicosanoic acid                               | 15-Cyano-2-methyl pentadecanoic acid             |
| Methyl-4-(2',3',4'-tri-O-acetyl-a-L-rhamnosyloxy) benzyl carbamate (E)      | Methyl hexadecanoate                 | Tetracosanoic acid                            | 9, 12-Octadecadienoic acid                       |
| Methyl-4-(2',3',4'-tri-O-acetyl-a-L-rhamnosyloxy) benzyl thiocarbamate (E)  | Ethyl pentadecanoate                 | $\beta$ -Sitosterol Propyl-p-hydroxy benzoate | 4,11-Dimethyl-12-docosanol                       |
| Methyl-4-(2',3',4'-tri-O-acetyl-a-L-rhamnosyloxy) benzyl thiocarbamate (Z)  | Ethyl hexadecanoate                  | Heptadecadien - 2 one                         | Methyl p-hydroxybenzoate                         |
| Methyl-4-(2',3',4'-tri-O-acetyl-a-L-rhamnosyloxy) benzyl carbamate (Z)      | Ethyl heptadecanoate                 | 6-Methyl docosane                             | 11-Cabonyl-12, 16-dioxo-14-hydroxy-18-tricoasene |
| Niazimicin B                                                                | Methyl octadecanoate                 | Ethyl octadeca-9,12-dienoate                  | Ethyl-4(a-L-rhamnosyloxy) benzyl carbamate       |
| Ethyl-4-(2',3',4'-tri-O-acetyl-a-L-rhamnosyloxy) benzyl carbamate (E)       | Ethyl octadecanoate                  | Docoasen-8-ol                                 | p-Hydroxybenzyl ethyl carbamate                  |
| Niazicin B                                                                  | Ethyl eicosanoae                     | p-Hydroxyphenyl methoxyethance                | Tetradecanoic acid                               |
| O-Ethyl-4 (2',3',4'-tri-O-acetyl-a-L-rhamnosyloxy) benzyl thiocarbamate (Z) | Ethyl docosanoate                    | 6, 9-Dimethyl dodecanoic acid                 | Heptadecanoic acid                               |
| Niazinin B                                                                  | Ethyl 9-octadecenoate                | 8-Heptadecanol                                | Dodecanyl isothiocyanate                         |
| Niazimicin A                                                                | Ethyl tricosanoate                   | 8-Nonadecanol                                 | 9-Methyl-eicoasen-1, 11-diol                     |
| Niazinin A                                                                  | Ethyl-9-hexadecenoate                | 9-Methyl pentadecene isothiocyanate           | p-Aminobenzaldehyde                              |
| Niazirinin                                                                  | Methyl octadeca-9, 12-dienoate       | Hexadecanoic acid                             | p-Hydroxyphenyl acetonitrile                     |
| NiaziminB                                                                   | Ethyl heptadeca-9, 12-dienoate       | 6-Methyl eicosane                             | 2-Octadecanone                                   |
| 4 (4'-O-Acetyl-a-L-rhamnosyloxy) benzaldehyde                               | Ethyl 9-nonadecenoate                | 1-Ethoxytricontane                            | Methyl 9-octadecenoate                           |
| Niazimin A                                                                  | 9-Methyl octadecane nitrile          | 1-Ethoxyheptadecane                           | Tetradecanyl isothiocyanate                      |
| Niazicin A                                                                  | Isothiocyanato-4-hexenoic acid       | Heptadecane nitrile                           | 1-Ethoxypentadecane                              |
| 4-(4'-O-Acetyl-a-Lrhamnosyloxy) benzyl isothiocyanate                       | Isothiocyanato-3-pentenoic acid      | 10-Methyl nonadecane isocyanate               | Heptadecane isocyanate                           |
| Niazirin                                                                    | 7-(p-Hydroxy) phenoxy heptanoic acid | Tridecene                                     | Octadecane isocyanate                            |
| 4-(a-L-Rhamnosyloxy) benzyl isthiocyanate                                   | (p-Hydroxy) Phenoxy acetic acid      | p-Hydroxybenzoic acid                         | Tricosane isothiocyanate                         |

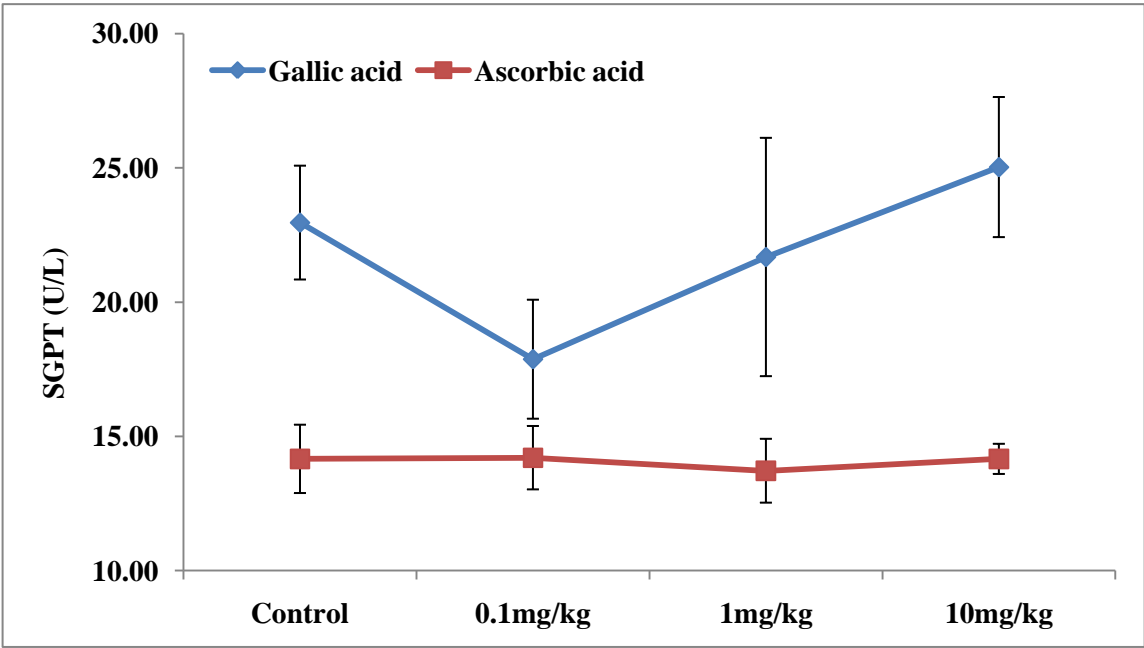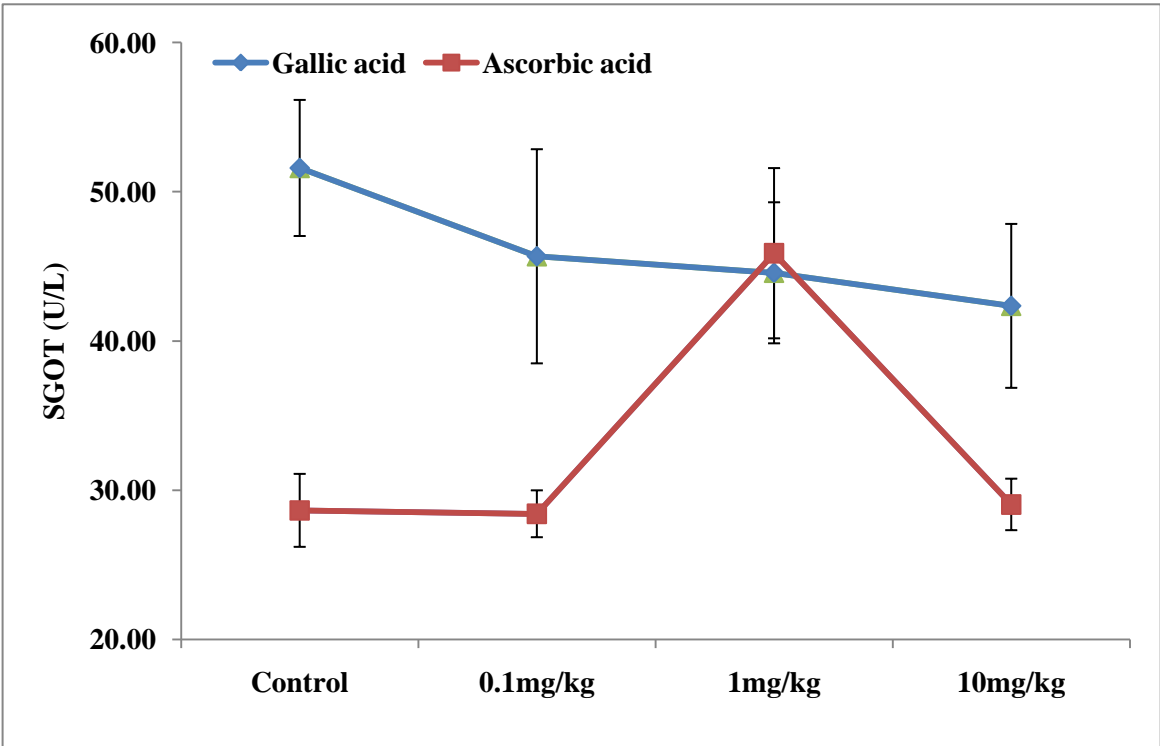

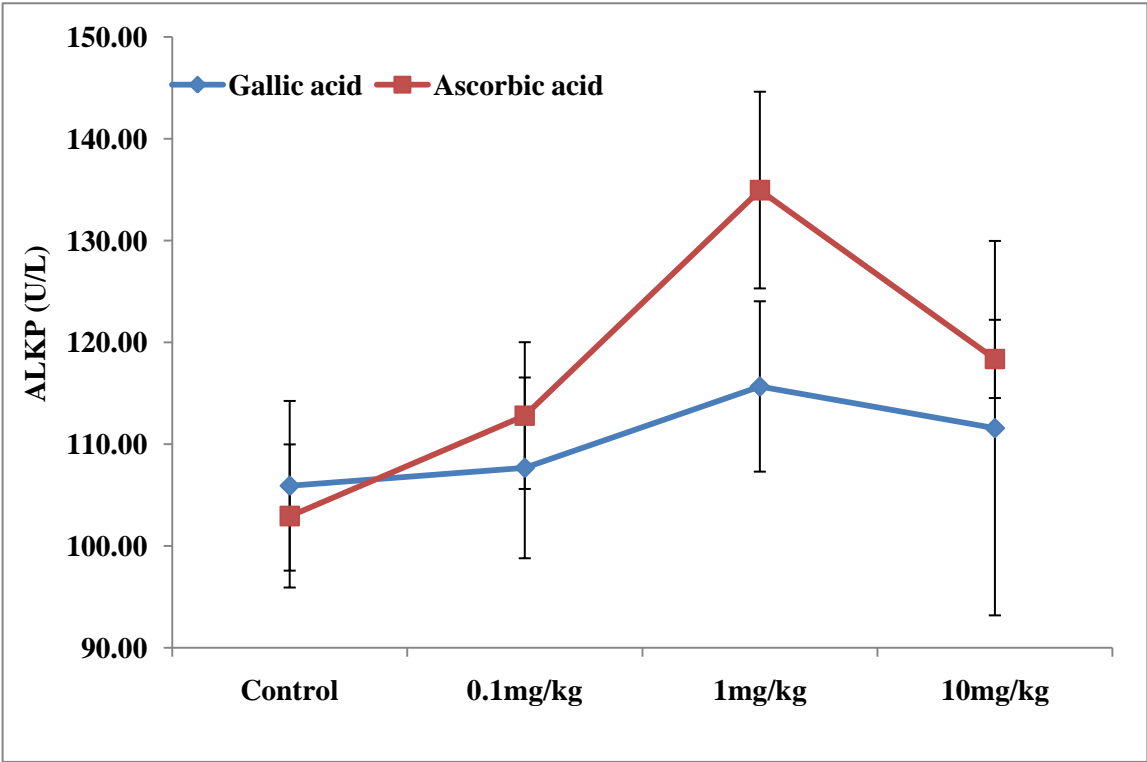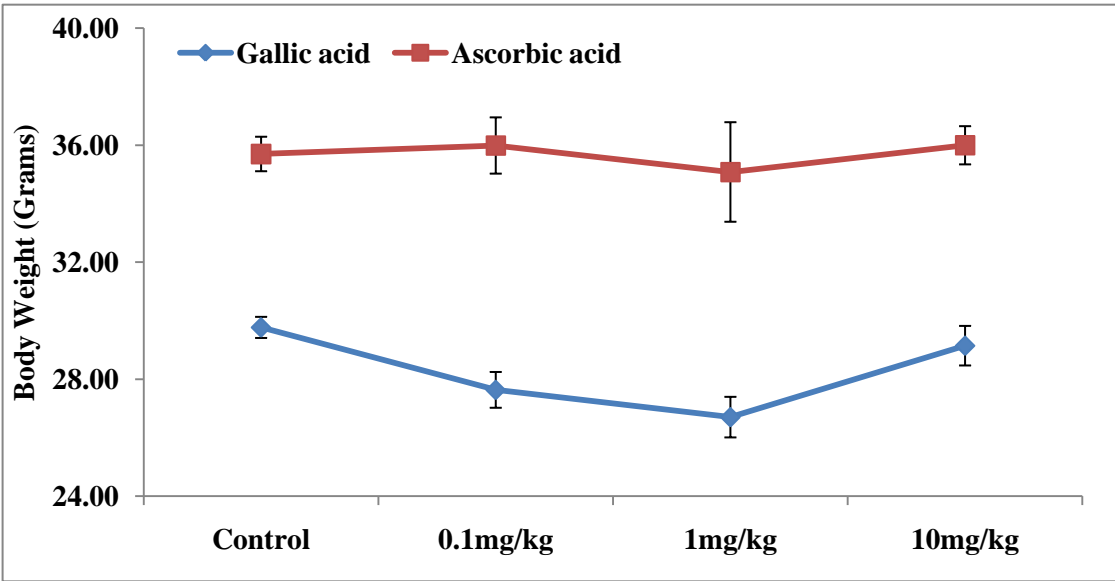

Supplement: f1 [file 519084.f1.pdf]
